# Supplementary material
Source: PubMed Central journal article supplement (PMC3241596)
Supplement: supp_mcr282_mcr282supp.pdf [file supp_mcr282_mcr282supp.pdf]

## SUPPLEMENTARY DATA

TABLE S1. 2C-values assessed with PI and DAPI from the species of *Narcissus* studied (means  $\pm$  s.d.). Geographic information for the populations studied (longitude and latitude) and number of individuals measured by flow cytometry are also given: *N* = number of individuals measured per population. *2n* = chromosome number of the species studied (Marques *et al.*, 2010). Chromosome counts are based on ten different metaphases per individual, except in the case of *Narcissus xalentejanus* where it was possible to observe only one metaphase plaque per population. In the case of *N. xperezlarae*, only two populations were counted (GTG and MDS).

| Species                | Population                                               | Longitude | Latitude | <i>N</i> | <i>2n</i> | PI (pg)          | DAPI (pg)        | % AT  |
|------------------------|----------------------------------------------------------|-----------|----------|----------|-----------|------------------|------------------|-------|
| <i>N. cavanillesii</i> | Portugal. Ponte da Ajuda. Marques1155 & Draper           | -7.1633   | 38.7749  | 8        | 28        | 32.19 $\pm$ 0.97 | 12.96 $\pm$ 1.90 | 24.00 |
|                        | Portugal. Montes Juntos. Marques1150                     | -7.31897  | 38.5159  | 4        | 28        | 33.77 $\pm$ 2.44 | 13.02 $\pm$ 1.78 | 23.03 |
|                        | Spain. Fuentes de Andalucía. Marques1162 & Draper        | -5.37064  | 37.4936  | 8        | 28        | 32.13 $\pm$ 1.27 | 12.51 $\pm$ 1.44 | 23.20 |
|                        | Spain. Sierra de Esparteros. Marques1164 & Draper        | -6.47799  | 37.2928  | 4        | 28        | 32.17 $\pm$ 0.10 | 12.96 $\pm$ 1.71 | 24.03 |
|                        | Spain. La Campana. Marques1162 & Draper                  | -5.2986   | 37.3964  | 6        | 28        | 30.52 $\pm$ 0.99 | 12.30 $\pm$ 1.28 | 24.01 |
|                        | Spain. Puebla del Río. Marques1143 & Draper              | -6.11273  | 37.2404  | 7        | 28        | 31.87 $\pm$ 0.43 | 13.09 $\pm$ 1.92 | 24.44 |
|                        | Spain. Medina Sidonia. Marques1161 & Draper              | -6.02645  | 36.4349  | 8        | 28        | 31.69 $\pm$ 0.74 | 12.60 $\pm$ 1.63 | 23.66 |
|                        | Spain. Aznalcázar. Marques1158 & Draper                  | -6.19861  | 37.2234  | 6        | 28        | 30.78 $\pm$ 1.22 | 13.16 $\pm$ 1.83 | 25.44 |
|                        | Spain. Dos Hermanas. Marques1131 & Draper                | -5.98745  | 37.2421  | 6        | 28        | 30.70 $\pm$ 1.13 | 12.35 $\pm$ 1.58 | 23.95 |
|                        | Spain. Matachel. Marques1168 & Draper                    | -5.96122  | 38.4363  | 8        | 28        | 30.90 $\pm$ 1.21 | 13.83 $\pm$ 0.80 | 26.65 |
|                        | Spain. Villamartín. Marques1147 & Draper                 | -5.68604  | 36.8484  | 8        | 28        | 30.99 $\pm$ 1.22 | 13.89 $\pm$ 0.81 | 26.68 |
|                        | Morocco. Tanger. Marques1190 & Draper                    | -5.76099  | 35.7738  | 4        | 28        | 30.98 $\pm$ 2.08 | 13.85 $\pm$ 0.50 | 26.68 |
|                        | Morocco. Temara. Marques1197 & Draper                    | -6.98789  | 33.9042  | 5        | 28        | 31.60 $\pm$ 0.88 | 14.01 $\pm$ 0.33 | 26.39 |
|                        | Morocco. Oued el Malah, Tétouan. Marques1191 & Draper    | -5.29396  | 35.6452  | 6        | 28        | 31.69 $\pm$ 1.13 | 14.44 $\pm$ 1.21 | 27.15 |
| <i>N. serotinus</i>    | Portugal. Ponte de Ajuda. Marques1156 & Draper           | -7.1633   | 38.7749  | 7        | 10        | 20.52 $\pm$ 0.46 | 17.44 $\pm$ 3.92 | 50.59 |
|                        | Portugal. Montes Juntos. Marques1151                     | -7.31897  | 38.5159  | 6        | 10        | 19.52 $\pm$ 0.69 | 18.03 $\pm$ 3.78 | 55.11 |
|                        | Spain. Fuentes de Andalucía. Marques1163 & Draper        | -5.37064  | 37.4936  | 8        | 10        | 19.57 $\pm$ 0.76 | 14.83 $\pm$ 2.46 | 45.01 |
|                        | Spain. Universidad Pablo de Olavide. Modesto Luceño s.n. | -6.47799  | 37.2928  | 4        | 10        | 20.24 $\pm$ 0.87 | 17.94 $\pm$ 4.69 | 52.94 |
|                        | Spain. Don Benito. P. Escobar s.n.                       | -6.04384  | 38.8611  | 4        | 10        | 20.88 $\pm$ 0.49 | 13.67 $\pm$ 1.55 | 38.98 |
|                        | Spain. Sierra de Esparteros. Marques1165 & Draper        | -5.48069  | 37.0952  | 7        | 10        | 19.77 $\pm$ 0.94 | 14.99 $\pm$ 4.46 | 45.32 |
|                        | Spain. Dos Hermanas. Marques1100 & Draper                | -5.98745  | 37.2421  | 7        | 10        | 21.06 $\pm$ 0.29 | 14.84 $\pm$ 3.29 | 41.93 |
|                        | Portugal. Póvoa de São Miguel. Marques2002 & Draper      | -7.33041  | 38.2705  | 8        | 10        | 21.30 $\pm$ 0.49 | 18.31 $\pm$ 3.48 | 51.21 |
|                        | Portugal. Monte Fidalgo. Marques1041 & Draper            | -7.28576  | 38.7131  | 5        | 10        | 19.72 $\pm$ 0.96 | 18.44 $\pm$ 4.56 | 55.56 |

|                        |                                                               |          |         |   |    |              |              |       |
|------------------------|---------------------------------------------------------------|----------|---------|---|----|--------------|--------------|-------|
|                        | Portugal. Vidigueira. Marques1013                             | -7.55147 | 38.1662 | 7 | 10 | 20.63 ± 0.57 | 18.07 ± 3.70 | 52.26 |
|                        | Portugal. Granja. Marques1018 & Rosselló-Graell               | -7.25175 | 38.3135 | 5 | 10 | 20.92 ± 0.49 | 19.78 ± 0.39 | 56.28 |
|                        | Spain. Gibraleón. Marques1135 & Draper                        | -6.91884 | 37.4064 | 5 | 10 | 21.06 ± 0.46 | 19.76 ± 0.38 | 55.86 |
|                        | Morocco. Cap Safi. Marques2219 & Draper                       | -9.23861 | 32.3245 | 5 | 10 | 19.96 ± 0.88 | 19.26 ± 0.50 | 57.45 |
|                        | Morocco. Essaouira. Marques2218 & Draper                      | -9.70584 | 31.3245 | 8 | 10 | 20.88 ± 0.52 | 19.74 ± 0.25 | 56.28 |
|                        | Morocco. Ondagha. Marques2215 & Draper                        | -9.76251 | 31.4596 | 8 | 10 | 20.96 ± 0.57 | 19.62 ± 0.38 | 55.75 |
| <i>N. miniatus</i>     | Spain. Al-Zahara. Marques1126 & Draper                        | -4.90573 | 37.8897 | 7 | 30 | 56.18 ± 3.44 | 35.27 ± 1.34 | 37.47 |
|                        | Spain. San Jose del Valle. Marques1175 & Draper               | -5.70111 | 36.6487 | 8 | 30 | 48.24 ± 8.59 | 35.51 ± 0.93 | 44.98 |
|                        | Spain. La Línea de la Concepción. Marques1138 & Draper        | -5.36293 | 36.1849 | 4 | 30 | 56.40 ± 2.09 | 36.13 ± 0.87 | 38.16 |
|                        | Spain. Llobregat. Marques1139 & Draper                        | 2.05591  | 41.2869 | 8 | 30 | 52.11 ± 6.88 | 35.49 ± 0.67 | 41.18 |
|                        | Spain. Turre. Marques1146 & Draper                            | -1.91345 | 37.1444 | 6 | 30 | 52.82 ± 2.21 | 35.76 ± 0.95 | 38.15 |
|                        | Spain. Los Belones. Marques1167 & Draper                      | -0.81965 | 37.5969 | 5 | 30 | 50.18 ± 2.64 | 35.79 ± 1.06 | 42.56 |
|                        | Spain. Torreblanca. Marques1176, Pérez Rovira & Draper        | 0.244166 | 40.2076 | 8 | 30 | 54.83 ± 2.97 | 36.35 ± 1.18 | 39.53 |
|                        | Spain. Xàbia. Marques1178 & Draper                            | 0.232567 | 38.7383 | 8 | 30 | 52.92 ± 3.28 | 37.58 ± 5.30 | 42.42 |
|                        | Spain. Dénia. Marques1129 & Draper                            | 0.114099 | 38.8177 | 7 | 30 | 52.65 ± 2.23 | 35.16 ± 6.46 | 39.70 |
|                        | Spain. La Campana. Marques1163 & Draper                       | -5.2986  | 37.3964 | 6 | 30 | 52.82 ± 2.03 | 34.31 ± 5.25 | 38.65 |
|                        | Spain. Aznalcázar. Marques1159 & Draper                       | -6.19861 | 37.2234 | 7 | 30 | 56.10 ± 1.87 | 37.77 ± 5.68 | 40.14 |
|                        | Spain. Puebla del Rio. Marques1009 & Draper                   | -6.11273 | 37.2404 | 8 | 30 | 52.62 ± 1.74 | 38.20 ± 3.90 | 43.27 |
|                        | Spain. Medina Sidonia. Marques1170 & Draper                   | -6.02645 | 36.4349 | 8 | 30 | 52.98 ± 2.83 | 36.55 ± 8.60 | 41.03 |
|                        | Spain. Dos Hermanas. Marques1130 & Draper                     | -5.98745 | 37.2421 | 7 | 30 | 52.23 ± 2.03 | 35.81 ± 5.35 | 40.84 |
|                        | Spain. Minorca. Fornells. Marques1132 & Draper                | 4.12817  | 40.0571 | 7 | 30 | 52.61 ± 2.50 | 28.94 ± 4.97 | 32.88 |
|                        | Spain. Majorca. Cost Xorriego. M. Vincens s.n.                | 2.90402  | 39.5752 | 7 | 30 | 54.24 ± 2.53 | 25.16 ± 5.98 | 27.45 |
| <i>N. elegans</i>      | Morocco. Lalla Minouna. Marques1201 & Draper                  | -5.99993 | 34.906  | 5 | 20 | 30.78 ± 0.13 | 29.00 ± 2.59 | 56.05 |
|                        | Morocco. Tanger. Marques1189 & Draper                         | -5.90752 | 35.7265 | 7 | 20 | 30.59 ± 0.41 | 26.29 ± 3.99 | 51.18 |
|                        | Morocco. Ksar-el-Kebir. Marques1200 & Draper                  | -5.51216 | 35.0865 | 5 | 20 | 30.62 ± 0.18 | 26.67 ± 2.05 | 51.86 |
|                        | Morocco. Cap Martil. Marques1193 & Draper                     | -5.30295 | 35.6027 | 7 | 20 | 30.68 ± 0.30 | 26.05 ± 2.59 | 50.52 |
|                        | Spain. Villanueva del Cauche. Marques2213 & Draper            | -4.39722 | 36.9055 | 8 | 20 | 30.65 ± 0.12 | 29.94 ± 3.90 | 58.14 |
|                        | Spain. Majorca. Cost Xorriego. M. Vincens s.n.                | 3.24328  | 39.3791 | 5 | 20 | 30.66 ± 0.08 | 29.41 ± 3.97 | 57.08 |
| <i>N. xalentejanus</i> | AJU. Portugal. Ponte de Ajuda. Marques1157                    | -7.1633  | 38.7749 | 8 | 19 | 22.92 ± 3.68 | 16.78 ± 3.54 | 45.06 |
|                        | MJT. Portugal. Montes Juntos. Marques1152                     | -7.31897 | 38.5159 | 8 | 19 | 27.18 ± 4.35 | 15.56 ± 5.08 | 35.26 |
|                        | FTA. Spain. Fuentes de Andalucía. Marques2030 & Draper        | -5.2986  | 37.3964 | 8 | 19 | 26.23 ± 4.65 | 14.03 ± 4.75 | 32.58 |
|                        | UPO. Spain. Universidad Pablo de Olavide. Modesto Luceño s.n. | -6.47799 | 37.2928 | 4 | 19 | 29.84 ± 3.83 | 15.81 ± 3.54 | 31.68 |

|                                                                            |                                                  |          |         |   |              |              |              |       |
|----------------------------------------------------------------------------|--------------------------------------------------|----------|---------|---|--------------|--------------|--------------|-------|
| <i>N. xperezlarae</i>                                                      | MDS. Spain. Medina Sidonia. Marques1172 & Draper | -6.02645 | 36.4349 | 8 | 29           | 46.14 ± 4.91 | 29.06 ± 4.17 | 37.73 |
|                                                                            | GTG. Spain. Gata de Gorgos. Marques1136 & Draper | 0.07835  | 38.7717 | 8 | 29           | 39.61 ± 4.60 | 29.47 ± 4.17 | 44.73 |
|                                                                            | DEN. Spain. Dénia. Marques1128 & Draper          | 0.11409  | 38.8177 | 8 | -            | 42.32 ± 5.05 | 26.49 ± 4.10 | 37.82 |
|                                                                            | OLI. Spain. Oliva. Marques1174 & Draper          | -0.10106 | 38.8793 | 8 | -            | 44.68 ± 4.49 | 27.42 ± 4.26 | 37.28 |
| Synthetic <i>N. cavanillesii</i> × <i>N. serotinus</i> F <sub>1</sub> (CS) | -                                                | -        | 5       |   | 29.32 ± 3.42 | 19.41 ± 2.26 | 39.88        |       |
| Synthetic <i>N. serotinus</i> × <i>N. cavanillesii</i> F <sub>1</sub> (SC) | -                                                | -        | 5       |   | 24.98 ± 4.14 | 18.04 ± 4.49 | 43.90        |       |
| Synthetic <i>N. cavanillesii</i> × <i>N. miniatus</i> F <sub>1</sub> (CM)  | -                                                | -        | 5       |   | 38.23 ± 5.71 | 36.05 ± 5.60 | 56.27        |       |
| Synthetic <i>N. miniatus</i> × <i>N. cavanillesii</i> F <sub>1</sub> (MC)  | -                                                | -        | 5       |   | 48.96 ± 4.31 | 39.14 ± 5.62 | 47.95        |       |

## REFERENCE

**Marques I, Nieto Feliner G, Draper D, Martins-Loução A, Fuertes Aguilar J. 2010.** Unraveling cryptic reticulate relationships and the origin of orphan hybrid disjunct populations in *Narcissus*. *Evolution* **64**: 2353–2368.
